# Supplementary material for: A catalyst-free C–H hydroarylation of coumarin derived ortho-quinone methide (o-QM) with electron rich arenes in glycerol
Source: Royal Society of Chemistry journal article supplement (doi:10.1039/c2ra21056h), 2012-01-01

# A catalyst-free C-H hydroarylation of coumarin derived *ortho*-Quinone methide (*o*-QM) with electron rich arenes in glycerol

Atul Kumar,\* Mukesh Kumar, Maneesh Kumar Gupta and Lalit Prakash Gupta

Medicinal and Process Chemistry Division, Central Drug Research Institute, Lucknow, CSIR, Lucknow India.  
Fax: 91-522-26234051; Tel: 91-522-2612411; E-mail: dratulsax@gmail.com

## Supporting Information

### Table of content

1. General information
2. General procedure for the preparation of C3-benzylated 4-hydroxycoumarin **4**, 4-hydroxypyronone **6** and C2-benzylated 1,3 diketone derivatives **8**.
3. Spectroscopic Data of C3-benzylated 4-hydroxycoumarin **4**, 4-hydroxypyronone **6** and C2-benzylated 1,3 diketone derivatives **8**.
4. <sup>1</sup>H NMR and <sup>13</sup>C NMR Spectra for Spectroscopic Data of C3-benzylated 4-hydroxycoumarin **4**, 4-hydroxypyronone **6** and C2-benzylated 1,3 diketone derivatives **8**.

## **1. General information**

Reagent grade solvents were used for extraction and flash chromatography. All the reagents and chemicals were purchased from Sigma-Aldrich Chemical Co, Lancaster and were used directly without further purification. The progress of reactions was checked by analytical thin-layer chromatography (TLC, Merck silica gel 60 F-254 plates). The plates were visualized first with UV illumination followed by iodine. Flash column chromatography was performed using silica gel (100-200 mesh). <sup>1</sup>H-NMR spectra were recorded at either 200 or 300 MHz and are reported in parts per million (ppm) on the δ scale relative to tetramethylsilane as an internal standard. <sup>13</sup>C-NMR spectra were recorded at either 50 or 75 MHz and are reported in parts per million (ppm) on the δ scale relative to CDCl<sub>3</sub> (δ 77.00). Mass spectra were obtained using JEOL SX-102 (ESI) instrument.

### **2. General procedure for the synthesis of 3-((4-(alkylamino)-2-methylphenyl)(phenyl)methyl)-4-hydroxy-2H-chromen-2-one (4a).**

4-Hydroxycoumarin, **1a** (1 mmol), benzaldehyde **2a** (1 mmol) and *m*-methyl *N,N*-dimethylaniline **3a** (1 mmol), and 3 mL glycerol were taken in a round-bottom flask equipped with a magnetic stirrer. The reaction mixture was then stirred at room temperature for an appropriate time and the progress of the reaction was monitored by TLC. After completion of the reaction, reaction mixture was washed with ethylacetate 4 to 5 times and the organic layer was separated from glycerol, dried over anhydrous sodium sulphate and concentrate the organic layer, the crude compounds were purified by column chromatography (silica gel, ethyl acetate:hexane).

### **General procedure for the synthesis of 3-((4-(alkylamino)-2-methylphenyl)(phenyl)methyl)-4-hydroxy-6-methyl-2H-pyran-2-one (6a).**

4-Hydroxypyronone, **5a** (1 mmol), benzaldehyde **2a** (1 mmol) and *m*-methyl *N,N*-dimethylaniline **3a** (1 mmol), and 3 mL glycerol were taken in a round-bottom flask equipped with a magnetic stirrer. The reaction mixture was then stirred at room temperature for an appropriate time and the progress of the reaction was monitored by TLC. After completion of the reaction, reaction mixture was washed with ethylacetate 4 to 5 times and the organic layer was separated from glycerol, dried over anhydrous sodium sulphate and concentrate the organic layer, the crude compounds were purified by column chromatography (silica gel, ethyl acetate:hexane).

### **General procedure for the synthesis of C2-alkylated dimethylamino cyclohex-2-enone (8a).**

1,3 diketone, **7a** (1 mmol), benzaldehyde **2a** (1 mmol) and *m*-methyl *N,N*-dimethylaniline **3a** (1 mmol), and 3 mL glycerol were taken in a round-bottom flask equipped with a magnetic stirrer. The reaction mixture was then stirred at room temperature for an appropriate time and the progress of the reaction was monitored by TLC. After completion of the reaction, reaction mixture was washed with ethylacetate 4 to 5 times and the organic layer was separated from glycerol, dried over anhydrous sodium sulphate and concentrate the organic layer, the crude compounds were purified by column chromatography (silica gel, ethyl acetate:hexane).

### 3.Spectroscopic Data of C3-benzylated 4-hydroxycoumarin,4-hydroxypyrrone and C2-benzylated 1,3 diketones.

#### 3-((4-(dimethylamino)-2-methylphenyl)(phenyl)methyl)-4-hydroxy-2H-chromen-2-one: **4a**

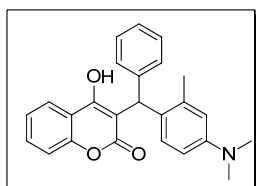

**<sup>1</sup>H NMR (300 MHz, CDCl<sub>3</sub>) δ (ppm):** 2.31(s, 3H), 2.94 (s, 6H), 5.89 (s, 1H), 6.53 (br, 1H), 6.65 (br, 1H), 6.87 (d, *J* = 7.6 Hz, 1H), 7.31-7.29 (m, 7H), 7.51 (br, 1H), 7.78 (d, *J* = 7.6 Hz, 1H). **<sup>13</sup>C NMR (50 MHz, CDCl<sub>3</sub>) δ (ppm):** 20.3, 40.5, 44.2, 105.8, 110.4, 115.3, 116.3, 117.5, 123.4, 126.6, 127.2, 128.6, 128.9, 129.1, 131.3, 138.6, 141.8, 149.8, 153.0, 163.6, 163.8; ESIMS: *m/z* 386 (M+H), calcd for C<sub>25</sub>H<sub>23</sub>NO<sub>3</sub> is C, 77.90; H, 6.01; N, 3.63. Found; C, 77.91; H, 6.03; N, 3.61.

#### 3-((4-chlorophenyl)(4-(dimethylamino)-2-methylphenyl)methyl)-4-hydroxy-2H-chromen-2-one: **4b**

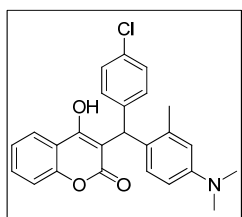

**<sup>1</sup>H NMR (300 MHz, CDCl<sub>3</sub>) δ (ppm):** 2.28(s, 3H), 2.94 (s, 6H), 5.78 (s, 1H), 6.54 (br, 1H), 6.76-6.71 (br, 2H), 7.18 (d, *J* = 8.3 Hz, 2H), 7.31 (d, *J* = 8.3 Hz, 4H), 7.54-7.48 (m, 1H), 7.71 (d, *J* = 7.8 Hz, 1H). **<sup>13</sup>C NMR (50 MHz, CDCl<sub>3</sub>) δ (ppm):** 20.2, 40.1, 44.2, 105.6, 110.4, 115.5, 116.2, 116.4, 123.2, 123.8, 125.4, 128.5, 128.9, 130.2, 131.9, 132.7, 139.1, 139.4, 150.2, 152.8, 161.8, 162.9; ESIMS: *m/z* 420 (M+H), calcd for C<sub>25</sub>H<sub>22</sub>ClNO<sub>3</sub> is C, 71.51; H, 5.28; N, 3.34. Found; C, 71.50; H, 5.29; N, 3.32.

**3-((4-(dimethylamino)-2-methylphenyl)(4-methoxyphenyl)methyl)-4-hydroxy-2H-chromen-2-one: 4c**

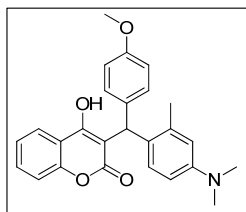

**<sup>1</sup>H NMR (300 MHz, CDCl<sub>3</sub>) δ (ppm):** 2.29(s, 3H), 2.93 (s, 6H), 3.80 (s, 3H), 5.79 (s, 1H), 6.52 (d, *J* = 7.9 Hz, 1H), 6.90-6.76 (m, 4H), 7.19 (d, *J* = 8.2 Hz, 1H), 7.32 (d, *J* = 8.3 Hz, 1H), 7.44-7.39 (m, 2H), 7.54 (t, *J* = 7.7 Hz, 1H), 7.73 (d, *J* = 7.1 Hz, 1H); ESIMS: *m/z* 416 (M+H), calcd for C<sub>26</sub>H<sub>25</sub>NO<sub>4</sub> is C, 75.16; H, 6.06; N, 3.37. Found; C, 75.14; H, 6.07; N, 3.36.

**3-((2,5-dimethoxyphenyl)(4-(dimethylamino)-2-methylphenyl)methyl)-4-hydroxy-2H-chromen-2-one: 4d**

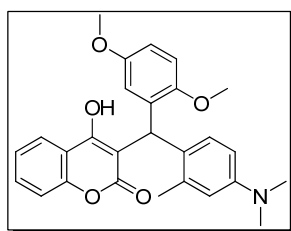

**<sup>1</sup>H NMR (300 MHz, CDCl<sub>3</sub>) δ (ppm):** 2.25(s, 3H), 2.92 (s, 6H), 3.66 (s, 3H), 3.71 (s, 3H), 5.99 (s, 1H), 6.50-6.46 (m, 1H), 6.72 (br, 1H), 6.75-6.74 (br, 1H), 6.87-6.80 (m, 3H), 7.11 (br, 1H), 7.51-7.25 (m, 3H); ESIMS: *m/z* 456 (M+H), calcd for C<sub>27</sub>H<sub>27</sub>NO<sub>5</sub> is C, 72.79; H, 6.11; N, 3.14. Found; C, 72.77; H, 6.10; N, 3.16.

**3-((4-(dimethylamino)-2-methylphenyl)(3,4,5-trimethoxyphenyl)methyl)-4-hydroxy-2H-chromen-2-one: 4e**

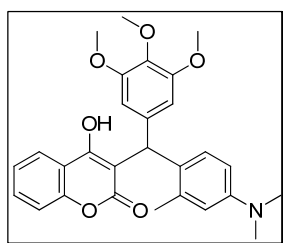

**<sup>1</sup>H NMR (300 MHz, CDCl<sub>3</sub>) δ (ppm):** 2.30(s, 3H), 2.96 (s, 6H), 3.77 (s, 6H), 3.86 (s, 3H), 5.80 (s, 1H), 6.49 (s, 2H), 6.55 (d, *J* = 5.9 Hz, 1H), 6.66 (br, 1H), 6.87 (d, *J* = 8.3 Hz, 2H), 7.36 (d, *J* = 8.4 Hz, 1H), 7.58 (t, *J* = 7.7 Hz, 1H), 7.76 (d, *J* = 7.6 Hz, 1H). **<sup>13</sup>C NMR (75**

**MHz, CDCl<sub>3</sub>) δ (ppm):** 20.2, 40.4, 44.9, 56.2, 60.8, 105.9, 106.6, 115.9, 116.4, 123.2, 123.8, 128.3, 131.9, 136.2, 137.3, 138.8, 152.7, 153.8, 161.1, 163.0; ESIMS: m/z 476 (M+H), calcd for C<sub>28</sub>H<sub>29</sub>NO<sub>6</sub> is C, 70.72; H, 6.15; N, 2.95. Found; C, 70.70; H, 6.16; N, 2.97

**3-(benzo[d][1,3]dioxol-5-yl(4-(dimethylamino)-2-methylphenyl)methyl)-4-hydroxy-2H-chromen-2-one: 4f**

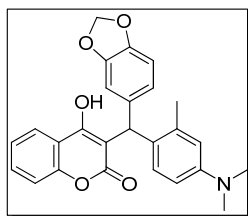

**<sup>1</sup>H NMR (300 MHz, CDCl<sub>3</sub>) δ (ppm):** 2.27(s, 3H), 2.93 (s, 6H), 5.74 (s, 1H), 5.95 (s, 2H), 6.53-6.49 (m, 1H), 6.70-6.63 (m, 2H), 6.78 (d, *J* = 8.0 Hz, 2H), 6.85 (d, *J* = 8.4 Hz, 1H), 7.24 (d, *J* = 7.3 Hz, 1H), 7.32 (d, *J* = 8.3 Hz, 1H), 7.54-7.49 (m, 1H), 7.70 (d, *J* = 1.2 Hz, 1H). **<sup>13</sup>C NMR (75 MHz, CDCl<sub>3</sub>) δ (ppm):** 20.2, 40.3, 44.4, 101.2, 106.6, 108.6, 109.4, 110.5, 115.6, 116.0, 116.4, 121.6, 123.1, 123.7, 125.8, 128.3, 131.8, 134.5, 138.8, 146.8, 148.4, 150.2, 152.7, 161.1, 162.9; ESIMS: m/z 430 (M+H), calcd for C<sub>26</sub>H<sub>23</sub>NO<sub>5</sub> is C, 72.71; H, 5.40; N, 3.26. Found; C, 72.69; H, 5.41; N, 3.27.

**3-((2,4-dichlorophenyl)(4-(dimethylamino)-2-methylphenyl)methyl)-4-hydroxy-2H-chromen-2-one: 4g**

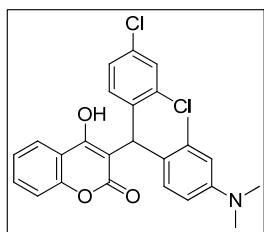

**<sup>1</sup>H NMR (300 MHz, CDCl<sub>3</sub>) δ (ppm):** 2.25(s, 3H), 2.88 (s, 6H), 5.94 (s, 1H), 6.43-6.38 (m, 1H), 6.54 (br, 1H), 6.59 (d, *J* = 3.8 Hz, 1H), 7.22-7.10 (m, 3H), 7.47-7.36 (m, 3H), 7.66-7.62 (m, 1H); **<sup>13</sup>C NMR (75 MHz, CDCl<sub>3</sub>) δ (ppm):** 20.2, 40.2, 42.4, 104.4, 110.5, 115.7, 115.8, 116.5, 123.2, 123.3, 123.8, 127.1, 127.6, 129.9, 130.2, 132.1, 133.4, 135.6, 137.4, 139.4, 150.4, 152.8, 162.1, 162.5; ESIMS: m/z 454 (M+H), calcd for C<sub>25</sub>H<sub>21</sub>Cl<sub>2</sub>NO<sub>3</sub> is C, 66.09; H, 4.66; N, 3.08. Found; C, 66.10; H, 4.64; N, 3.09.

**3-((3,4-dichlorophenyl)(4-(dimethylamino)-2-methylphenyl)methyl)-4-hydroxy-2H-chromen-2-one: 4h**

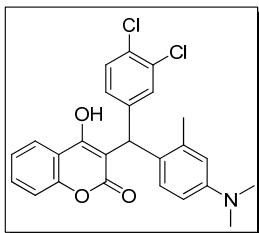

**<sup>1</sup>H NMR (300 MHz, CDCl<sub>3</sub>) δ (ppm):** 2.29(s, 3H), 2.95 (s, 6H), 5.76 (s, 1H), 6.52-6.49 (m, 1H), 6.65-6.64 (br, 1H), 6.73 (d, *J* = 8.5 Hz, 1H), 7.12-7.09 (m, 1H), 7.34-7.23 (m, 2H), 7.41 (d, *J* = 8.2 Hz, 1H), 7.56-7.51 (m, 2H), 7.75 (d, *J* = 7.8 Hz, 1H); ESIMS: *m/z* 454 (M+H), calcd for C<sub>25</sub>H<sub>21</sub>Cl<sub>2</sub>NO<sub>3</sub> is C, 66.09; H, 4.66; N, 3.08. Found; C, 66.08; H, 4.64; N, 3.09.

**3-((4-(diethylamino)phenyl)(2,4-dimethoxyphenyl)methyl)-4-hydroxy-2H-chromen-2-one: 4i**

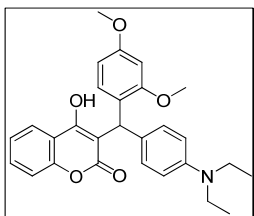

**<sup>1</sup>H NMR (300 MHz, CDCl<sub>3</sub>) δ (ppm):** 1.16 (t, *J* = 6.9 Hz, 6H), 3.35 (q, *J* = 7.2 Hz, 4H), 3.68 (s, 3H), 3.74 (s, 3H), 5.96 (s, 1H), 6.63 (d, *J* = 8.4 Hz, 2H), 6.82-6.79 (m, 2H), 6.89 (d, *J* = 8.6 Hz, 1H), 7.30-6.92 (m, 4H), 7.52 (t, *J* = 8.2 Hz, 1H), 7.75 (br, 1H); ESIMS: *m/z* 460 (M+H), calcd for C<sub>28</sub>H<sub>29</sub>NO<sub>5</sub> is C, 73.18; H, 6.36; N, 3.05. Found; C, 73.17; H, 6.37; N, 3.04.

**3-((4-(dimethylamino)-2-methylphenyl)(4-methoxyphenyl)methyl)-4-hydroxy-6-methyl-2H-pyran-2-one: 6a**

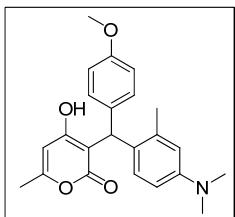

**<sup>1</sup>H NMR (300 MHz, CDCl<sub>3</sub>) δ (ppm):** 2.20(s, 3H), 2.26(s, 3H), 2.92 (s, 6H), 3.80 (s, 3H), 5.61 (s, 1H), 5.71 (s, 1H), 6.49 (q, *J* = 8.4 Hz, 1H), 6.64-6.43 (br, 1H), 6.74 (d, *J* = 8.4 Hz, 1H), 6.89 (d, *J* = 8.4 Hz, 2H), 7.13 (d, *J* = 8.4 Hz, 2H); **<sup>13</sup>C NMR (75 MHz, CDCl<sub>3</sub>) δ (ppm):** 19.7, 20.1, 40.4, 43.1, 55.3, 100.9, 104.1, 110.4, 113.7, 114.3, 115.5, 126.7, 128.4, 129.7, 132.8, 138.6, 149.9, 158.6, 160.8, 165.3, 165.8; ESIMS: *m/z* 380 (M+H), calcd for C<sub>23</sub>H<sub>25</sub>NO<sub>4</sub> is C, 72.80; H, 6.64; N, 3.69. Found; C, 72.81; H, 6.62; N, 3.68.

**3-((4-(dimethylamino)-2-methylphenyl)(3,4,5-trimethoxyphenyl)methyl)-4-hydroxy-6-methyl-2H-pyran-2-one: 6b**

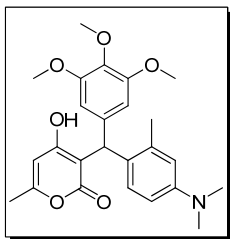

**<sup>1</sup>H NMR (300 MHz, CDCl<sub>3</sub>) δ (ppm):** 2.19 (s, 3H), 2.23 (s, 3H), 2.90 (s, 6H), 3.74 (s, 6H), 3.81 (s, 3H), 5.56 (s, 1H), 5.69 (s, 1H), 6.39 (s, 2H), 6.48-6.45 (m, 1H), 6.61-6.60 (br, 1H), 6.74 (d, *J* = 8.5 Hz, 1H); **<sup>13</sup>C NMR (50 MHz, CDCl<sub>3</sub>) δ (ppm):** 19.7, 20.1, 40.3, 44.2, 56.1, 60.8, 100.8, 103.8, 105.8, 110.4, 115.5, 126.2, 128.2, 136.6, 137.0, 138.6, 150.0, 153.5, 161.0, 165.0, 165.9; ESIMS: *m/z* 440 (M+H), calcd for C<sub>25</sub>H<sub>29</sub>NO<sub>6</sub> is C, 68.32; H, 6.65; N, 3.19. Found; C, 68.31; H, 6.64; N, 3.17.

**3-((3,4-dimethoxyphenyl)(4-(dimethylamino)-2-methylphenyl)methyl)-4-hydroxy-6-methyl-2H-pyran-2-one: 6c**

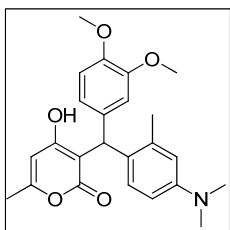

**<sup>1</sup>H NMR (300 MHz, CDCl<sub>3</sub>) δ (ppm):** 2.09 (s, 3H), 2.15 (s, 3H), 2.82 (s, 6H), 3.70 (s, 3H), 3.75 (s, 3H), 5.50 (s, 1H), 5.61 (s, 1H), 6.41 (d, *J* = 8.0 Hz, 1H), 6.57 (d, *J* = 6.8 Hz, 2H), 6.71-6.64 (m, 3H); **<sup>13</sup>C NMR (50 MHz, CDCl<sub>3</sub>) δ (ppm):** 19.7, 20.1, 40.4, 43.5, 55.8, 100.8, 104.0, 110.4, 111.2, 112.3, 115.5, 120.1, 126.5, 128.2, 133.4, 138.6, 148.2, 149.5, 149.9, 160.9, 165.1, 165.9; ESIMS: *m/z* 410 (M+H), calcd for C<sub>24</sub>H<sub>27</sub>NO<sub>5</sub> is C, 70.40; H, 6.65; N, 3.42. Found; C, 70.42; H, 6.64; N, 3.43.

**3-((2,4-dichlorophenyl)(4-(dimethylamino)-2-methylphenyl)methyl)-4-hydroxy-6-methyl-2H-pyran-2-one: 6d**

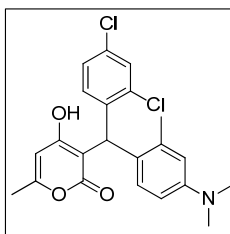

**<sup>1</sup>H NMR (300 MHz, CDCl<sub>3</sub>) δ (ppm):** 2.11 (s, 3H), 2.20 (s, 3H), 2.85 (s, 6H), 5.63 (s, 1H), 5.73 (s, 1H), 6.38-6.35 (m, 1H), 6.55 (d, *J* = 8.6 Hz, 2H), 7.04 (d, *J* = 8.3 Hz, 1H), 7.14-7.10 (m, 1H); 7.32-7.32 (br, 1H); ESIMS: *m/z* 418 (M+H), calcd for C<sub>22</sub>H<sub>21</sub>Cl<sub>2</sub>NO<sub>3</sub> is C, 63.17; H, 5.06; N, 3.35. Found; C, 63.15; H, 5.07; N, 3.34.

**3-(benzo[d][1,3]dioxol-5-yl(4-(dimethylamino)-2-methylphenyl)methyl)-4-hydroxy-6-methyl-2H-pyran-2-one: 6e**

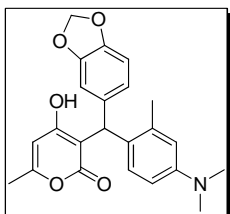

**<sup>1</sup>H NMR (300 MHz, CDCl<sub>3</sub>) δ (ppm):** 2.21 (s, 3H), 2.27 (s, 3H), 2.94 (s, 6H), 5.58 (s, 1H), 5.72 (s, 1H), 5.97 (s, 2H), 6.51-6.48 (m, 1H), 6.66 (dd, *J* = 1.2 Hz, 1.7 Hz, 2H), 6.72-6.72 (br, 1H); 6.79 (d, *J* = 8.1 Hz, 2H); **<sup>13</sup>C NMR (50 MHz, CDCl<sub>3</sub>) δ (ppm):** 19.6, 20.1, 40.3, 43.6, 100.8, 101.1, 103.8, 108.4, 109.4, 110.4, 115.5, 121.5, 126.3, 128.3, 134.9, 138.6, 146.6, 148.2, 149.9, 160.9, 165.0, 165.9; ESIMS: *m/z* 394 (M+H), calcd for C<sub>23</sub>H<sub>23</sub>NO<sub>5</sub> is C, 70.21; H, 5.89; N, 3.56. Found; C, 70.20; H, 5.88; N, 3.57.

**3-(1-(4-(dimethylamino)-2-methylphenyl)-3-methylbutyl)-4-hydroxy-6-methyl-2H-pyran-2-one: 6f**

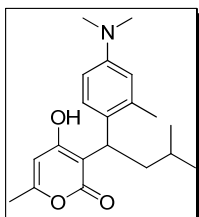

**<sup>1</sup>H NMR (300 MHz, CDCl<sub>3</sub>) δ (ppm):** 0.93 (d, *J* = 6.4 Hz, 3H), 1.00 (d, *J* = 6.3 Hz, 3H), 1.77-1.59 (m, 3H), 2.14 (s, 3H), 2.21 (s, 3H), 2.93 (s, 6H), 4.37 (t, *J* = 6.8 Hz, 1H), 5.60 (s, 1H), 6.62 (br, 2H), 7.37 (t, *J* = 4.7 Hz, 1H); **<sup>13</sup>C NMR (50 MHz, CDCl<sub>3</sub>) δ (ppm):** 19.5, 20.1, 22.4, 23.1, 25.5, 34.2, 40.5, 40.9, 101.2, 105.4, 110.5, 115.9, 126.2, 126.3, 127.3, 139.2, 149.5, 160.1, 165.4, 165.7; ESIMS: *m/z* 330 (M+H), calcd for C<sub>20</sub>H<sub>27</sub>NO<sub>3</sub> is C, 72.92; H, 8.26; N, 4.25. Found; C, 72.90; H, 8.27; N, 4.23.

**3-(1-(4-(dimethylamino)-2-methylphenyl)-2-methylpropyl)-4-hydroxy-6-methyl-2H-pyran-2-one: 6g**

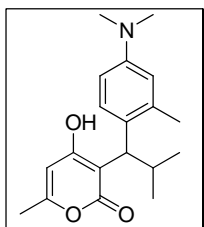

**<sup>1</sup>H NMR (300 MHz, CDCl<sub>3</sub>) δ (ppm):** 0.94-0.87 (br, 6H), 1.71-1.58 (m, 1H), 2.13 (s, 3H), 2.20 (s, 3H), 2.91 (s, 6H), 4.26 (br, 1H), 5.67 (s, 1H), 6.60 (br, 2H), 7.40 (d, *J* = 7.8 Hz, 1H);



ESIMS:  $m/z$  316 (M+H), calcd for  $C_{19}H_{25}NO_3$  is C, 72.35; H, 7.99; N, 4.44. Found; C, 72.34; H, 7.98; N, 4.46.

**3-(1-(4-(dimethylamino)-2-methylphenyl)butyl)-4-hydroxy-6-methyl-2H-pyran-2-one:  
6h**

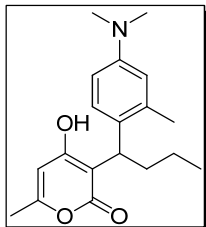

**$^1H$  NMR (300 MHz,  $CDCl_3$ )  $\delta$  (ppm):** 0.83 (d,  $J = 6.7$  Hz, 1H), 0.89 (d,  $J = 6.2$  Hz, 3H), 0.96 (d,  $J = 6.2$  Hz, 3H), 2.07 (s, 3H), 2.25 (s, 3H), 2.88 (s, 6H), 3.96 (d,  $J = 10.4$  Hz, 1H), 5.78 (s, 1H), 6.62 (br, 2H), 7.56 (d,  $J = 8.4$  Hz, 1H);  **$^{13}C$  NMR (50 MHz,  $CDCl_3$ )  $\delta$  (ppm):** 13.7, 20.7, 21.2, 21.7, 30.5, 41.0, 43.5, 101.6, 105.2, 111.0, 115.4, 128.5, 128.8, 130.8, 130.9, 132.4, 138.3, 148.2, 159.8, 166.8, 166.9, 167.8; ESIMS:  $m/z$  316 (M+H), calcd for  $C_{19}H_{25}NO_3$  is C, 72.35; H, 7.99; N, 4.44. Found; C, 72.33; H, 7.98; N, 4.45.

**3-((4-(dimethylamino)phenyl)(4-methoxyphenyl)methyl)-4-hydroxy-6-methyl-2H-pyran-2-one: 6i**

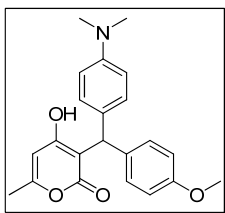

**$^1H$  NMR (300 MHz,  $CDCl_3$ )  $\delta$  (ppm):** 2.16 (s, 3H), 2.90 (s, 6H), 3.77 (s, 3H), 5.57 (s, 1H), 5.71 (s, 1H), 6.67 (d,  $J = 8.6$  Hz, 2H), 6.85 (d,  $J = 8.6$  Hz, 2H), 7.03 (d,  $J = 8.5$  Hz, 2H), 7.14 (d,  $J = 8.5$  Hz, 2H);  **$^{13}C$  NMR (50 MHz,  $CDCl_3$ )  $\delta$  (ppm):** 19.6, 40.7, 44.9, 55.3, 101.1, 105.5, 113.1, 114.2, 127.9, 129.3, 129.7, 132.8, 149.7, 158.6, 160.8, 165.4, 165.5; ESIMS:  $m/z$  366 (M+H), calcd for  $C_{22}H_{23}NO_4$  is C, 72.31; H, 6.34; N, 3.83. Found; C, 72.33; H, 6.32; N, 3.84.

**3-((4-chlorophenyl)(4-(diethylamino)phenyl)methyl)-4-hydroxy-6-methyl-2H-pyran-2-one: 6j**

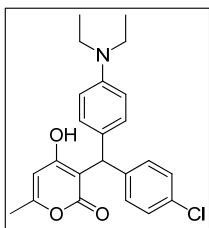

**<sup>1</sup>H NMR (300 MHz, CDCl<sub>3</sub>) δ (ppm):** 1.17 (t, *J* = 6.7 Hz, 6H), 2.16 (s, 3H), 3.36 (q, *J* = 6.9 Hz, 4H), 5.60 (s, 1H), 5.76 (s, 1H), 6.63 (d, *J* = 8.6 Hz, 2H), 7.04 (d, *J* = 8.6 Hz, 2H), 7.19 (s, 1H), 7.28 (d, *J* = 7.6 Hz, 3H); **<sup>13</sup>C NMR (75 MHz, CDCl<sub>3</sub>) δ (ppm):** 12.5, 19.6, 44.5, 44.7, 102.4, 104.2, 112.5, 128.1, 129.8, 130.2, 131.7, 141.3, 146.2, 160.5, 166.3, 168.8; ESIMS: *m/z* 398 (M+H), calcd for C<sub>23</sub>H<sub>24</sub>ClNO<sub>3</sub> is C, 69.43; H, 6.08; N, 3.52. Found; C, 69.44; H, 6.06; N, 3.53.

**2-((4-chlorophenyl)(4-(dimethylamino)-2-methylphenyl)methyl)-3-hydroxy-5,5-dimethylcyclohex-2-enone: 8a**

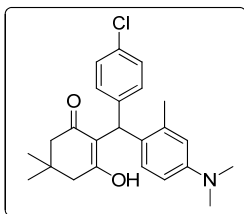

**<sup>1</sup>H NMR (300 MHz, CDCl<sub>3</sub>) δ (ppm):** 1.17 (s, 6H), 2.15 (s, 3H), 2.19 (br, 2H), 2.24 (br, 2H), 2.83 (s, 6H), 5.57 (s, 1H), 6.37 (d, *J* = 8.1 Hz, 1H), 6.53 (d, *J* = 8.8 Hz, 2H), 7.06 (d, *J* = 7.8 Hz, 2H), 7.21 (m, 2H). **<sup>13</sup>C NMR (75 MHz, CDCl<sub>3</sub>) δ (ppm):** 20.5, 22.6, 28.3, 31.6, 40.3, 41.6, 50.5, 110.5, 115.2, 115.6, 127.1, 128.3, 128.8, 130.2, 132.3, 138.6, 140.7, 149.8; ESIMS: *m/z* 398 (M+H), calcd for C<sub>24</sub>H<sub>28</sub>ClNO<sub>2</sub> is C, 72.44; H, 7.09; N, 3.52. Found; C, 72.42; H, 7.10; N, 3.51.

**2-((4-chlorophenyl)(4-(dimethylamino)-2-methylphenyl)methyl)-3-hydroxycyclohex-2-enone: 8b**

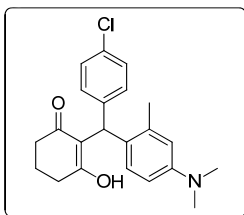

**<sup>1</sup>H NMR (300 MHz, CDCl<sub>3</sub>) δ (ppm):** 1.99 (t, *J* = 6.3 Hz, 2H), 2.22 (s, 3H), 2.46-2.37 (m, 4H), 2.90 (s, 6H), 5.66 (s, 1H), 6.44-6.41 (m, 1H), 6.61 (d, *J* = 10.5 Hz, 2H), 7.13 (d, *J* = 8.2 Hz, 2H), 7.25 (s, 1H), 7.29 (s, 1H). **<sup>13</sup>C NMR (75 MHz, CDCl<sub>3</sub>) δ (ppm):** 20.1, 20.7, 31.6, 31.9, 36.8, 40.3, 110.4, 115.6, 116.2, 127.2, 128.2, 128.7, 130.2, 132.3, 138.7, 140.6, 149.8, 172.9, 197.1; ESIMS: *m/z* 370 (M+H), calcd for C<sub>22</sub>H<sub>24</sub>ClNO<sub>2</sub> is C, 71.44; H, 6.54; N, 3.79; Found; C, 71.42; H, 6.55; N, 3.77.

**5-((4-chlorophenyl)(4-(dimethylamino)-2-methylphenyl)methyl)-1,3-dimethylpyrimidine-2,4,6(1H,3H,5H)-trione: 8c**

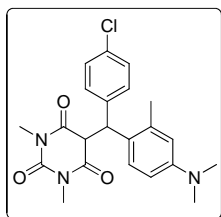

**<sup>1</sup>H NMR (300 MHz, CDCl<sub>3</sub>) δ (ppm):** 2.09 (s, 3H), 2.88 (s, 6H), 3.02 (s, 3H), 3.15 (s, 3H), 4.28 (d, *J* = 2.8 Hz, 1H), 5.04 (s, 1H), 6.44 (s, 1H), 6.50 (d, *J* = 8.4 Hz, 1H), 7.13 (d, *J* = 7.4 Hz, 3H), 7.22 (d, *J* = 8.4 Hz, 2H). **<sup>13</sup>C NMR (75 MHz, CDCl<sub>3</sub>) δ (ppm):** 20.3, 28.5, 40.3, 49.6, 53.9, 110.2, 114.9, 124.2, 128.4, 129.1, 129.7, 132.7, 136.9, 138.9, 149.7, 168.2; ESIMS: *m/z* 414 (M+H), calcd for C<sub>22</sub>H<sub>24</sub>ClN<sub>3</sub>O<sub>3</sub> is C, 63.84; H, 5.84; N, 10.15; Found; C, 63.82; H, 5.83; N, 10.16.

**2-(4-(dimethylamino)-2-methylbenzyl)-3-hydroxy-5,5-dimethylcyclohex-2-enone: 8d**

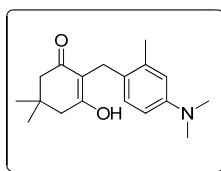

**<sup>1</sup>H NMR (300 MHz, CDCl<sub>3</sub>) δ (ppm):** 1.12 (s, 6H), 2.19 (s, 4H), 2.41 (s, 3H), 3.01 (s, 6H), 3.23 (s, 2H), 6.66-6.64 (m, 1H), 7.27-7.20 (m, 2H). ESIMS: *m/z* 288 (M+H), calcd for C<sub>18</sub>H<sub>25</sub>NO<sub>2</sub> is C, 75.22; H, 8.77; N, 4.87 Found; C, 75.20; H, 8.78; N, 4.88.

**4. <sup>1</sup>H NMR and <sup>13</sup>C NMR Spectra for Spectroscopic Data of C3-benzylated 4-hydroxycoumarin, 4-hydroxypyron and C2-benzylated 1,3 diketones.**

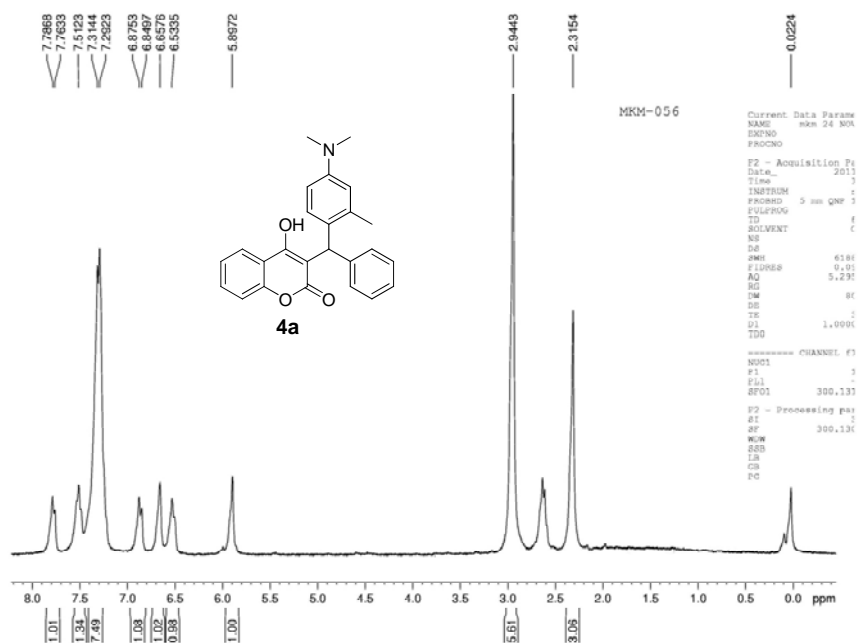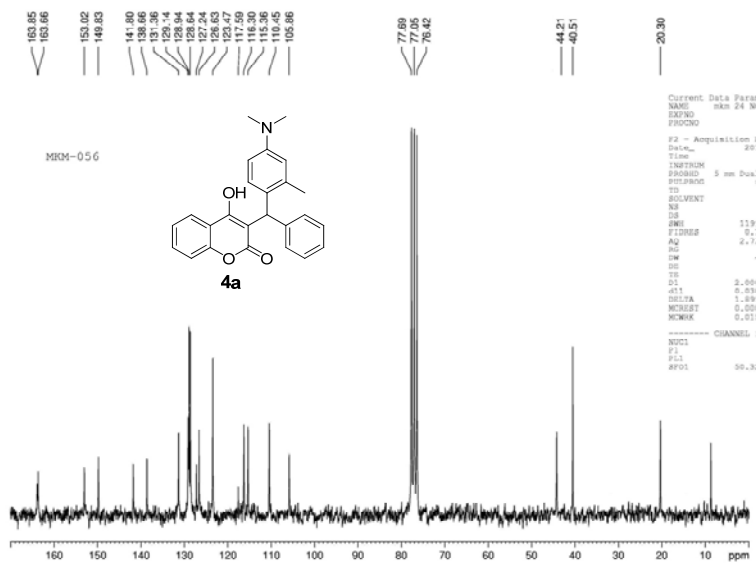

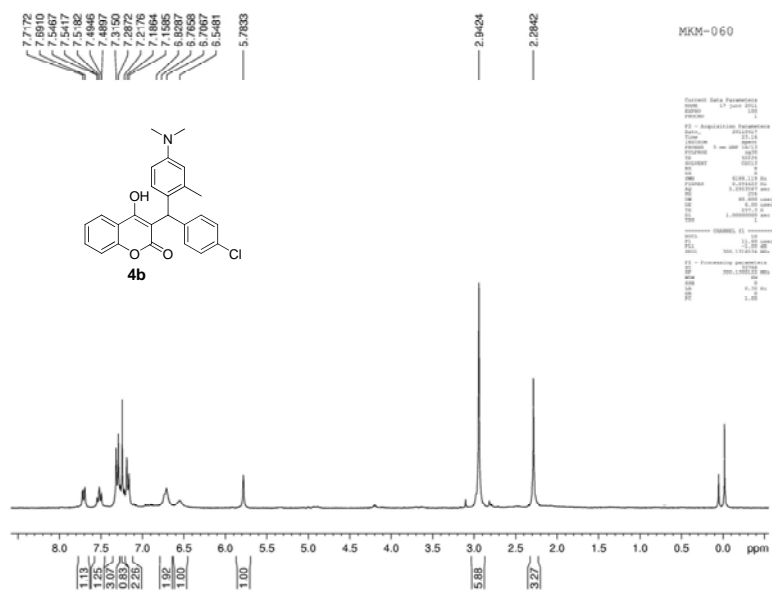

MRM-060

```

Current Data Parameters
Name: 4b
Date_: 20120113
Time: 11:13
ExpNo: 1
ProcNo: 1
F2 - Acquisition Parameters
Date_: 20120113
Time: 11:13
ExpNo: 1
ProcNo: 1
F2 - Processing parameters
Name: 4b
Date_: 20120113
Time: 11:13
ExpNo: 1
ProcNo: 1
F2 - Processing parameters
Name: 4b
Date_: 20120113
Time: 11:13
ExpNo: 1
ProcNo: 1

```

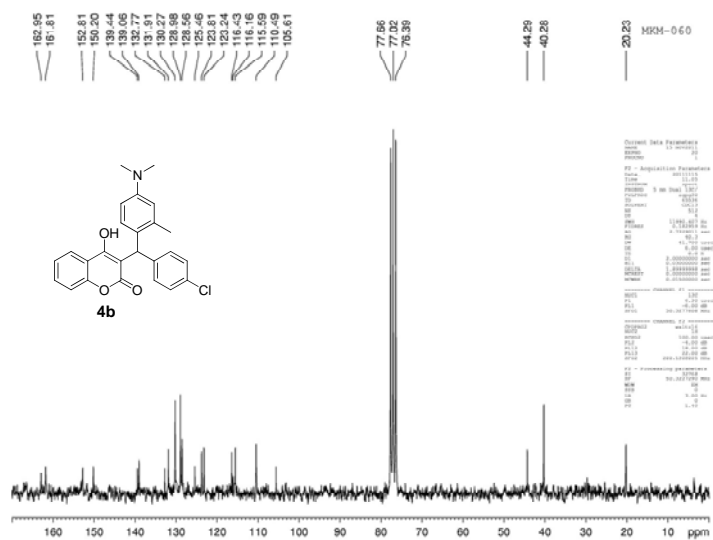

MRM-060

```

Current Data Parameters
Name: 4b
Date_: 20120113
Time: 11:13
ExpNo: 1
ProcNo: 1
F2 - Acquisition Parameters
Date_: 20120113
Time: 11:13
ExpNo: 1
ProcNo: 1
F2 - Processing parameters
Name: 4b
Date_: 20120113
Time: 11:13
ExpNo: 1
ProcNo: 1
F2 - Processing parameters
Name: 4b
Date_: 20120113
Time: 11:13
ExpNo: 1
ProcNo: 1

```

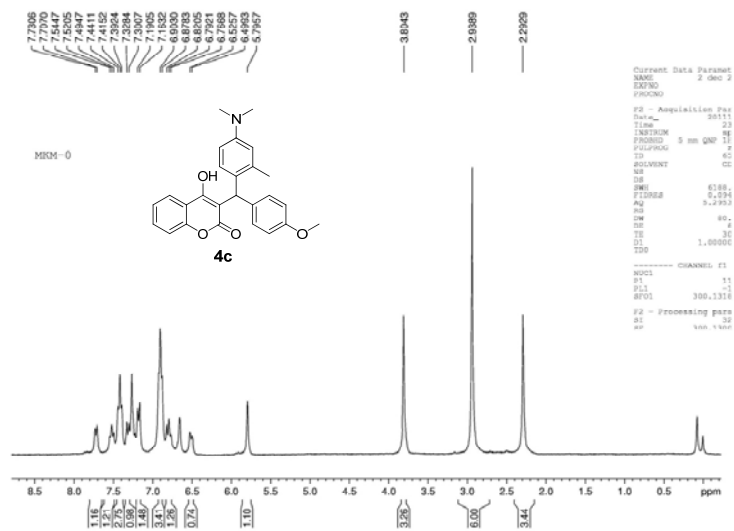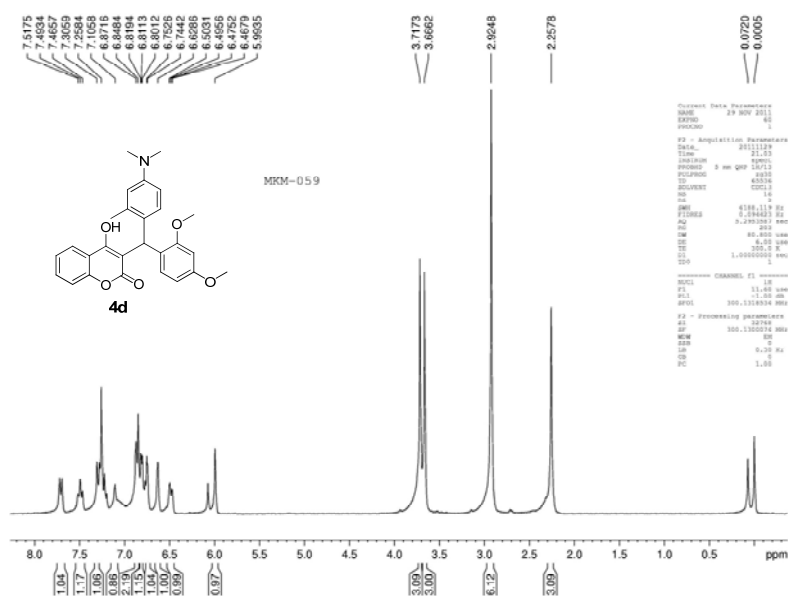

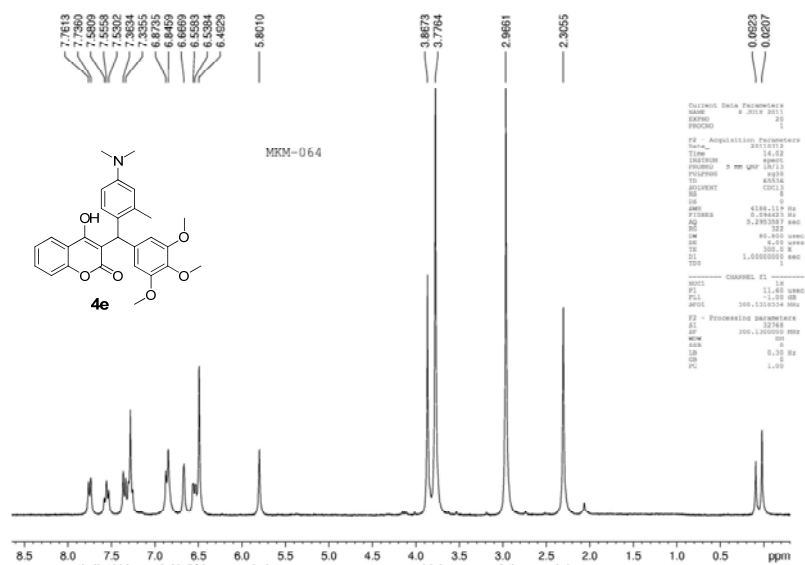

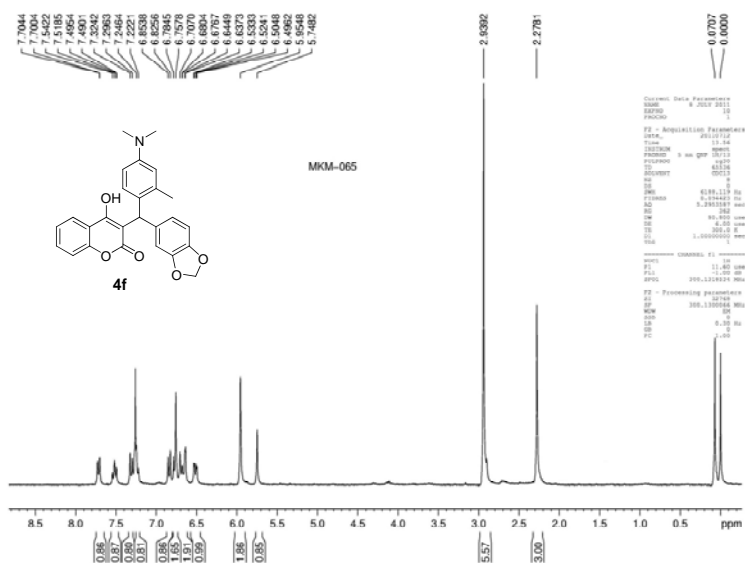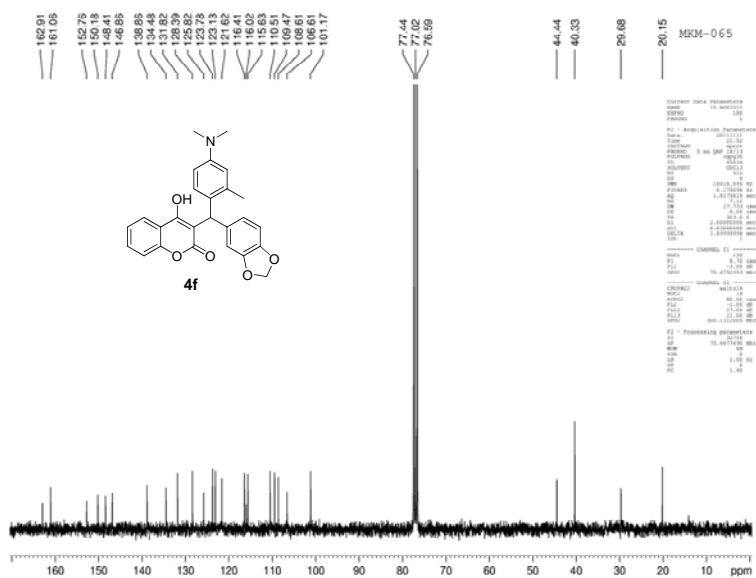







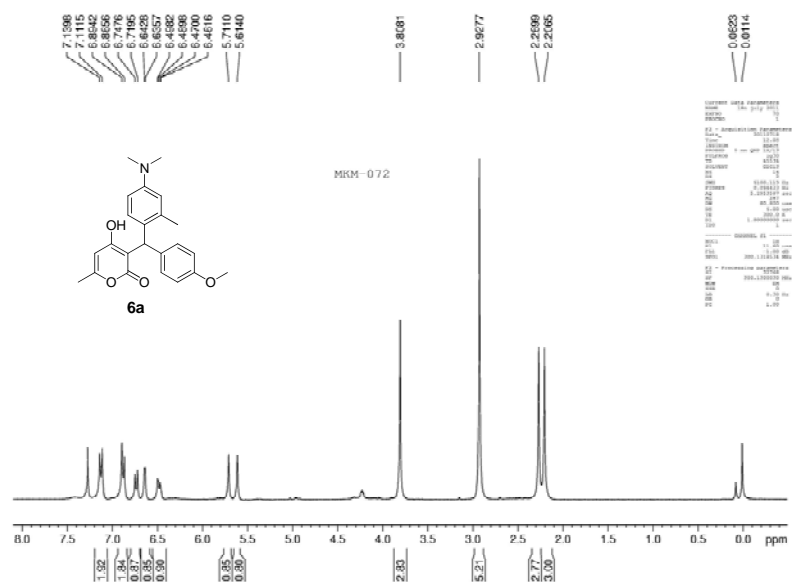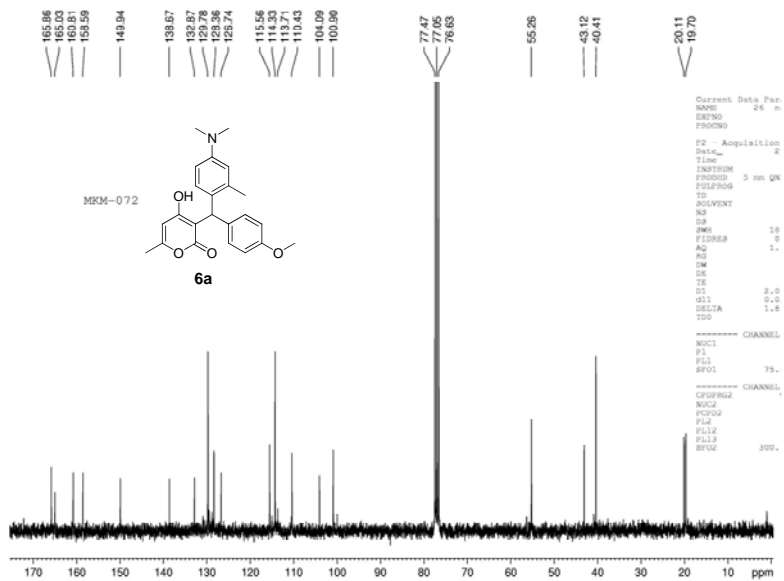

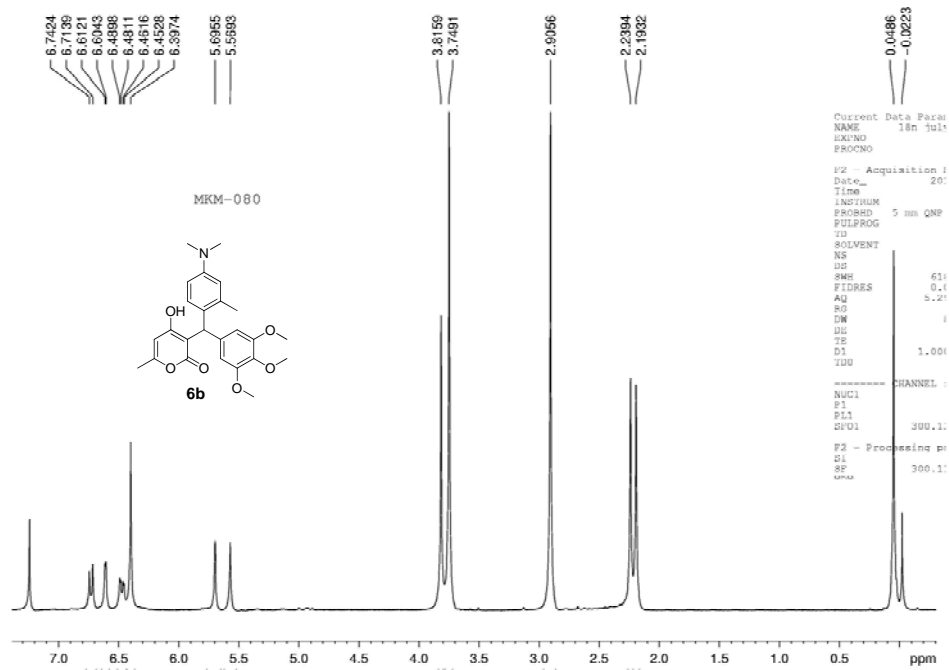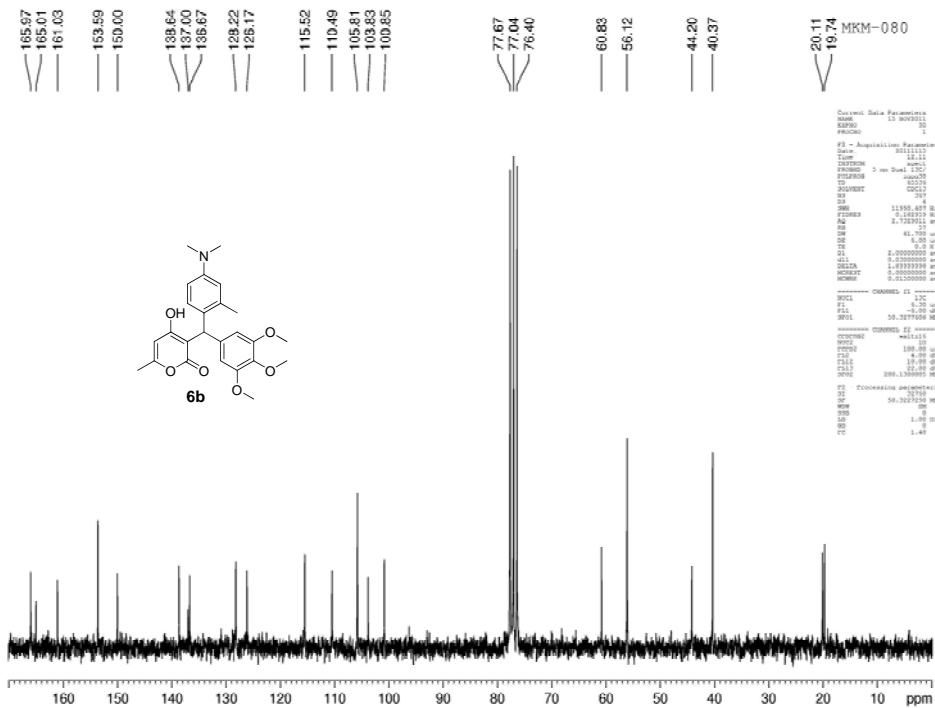



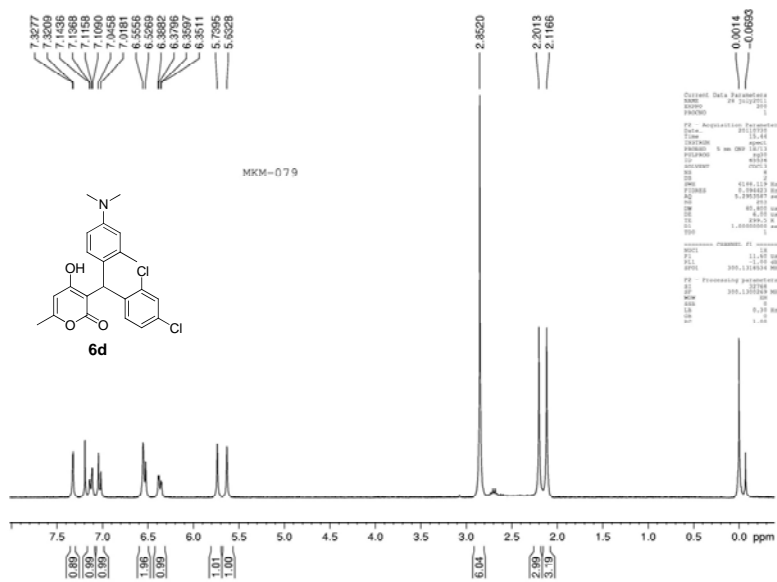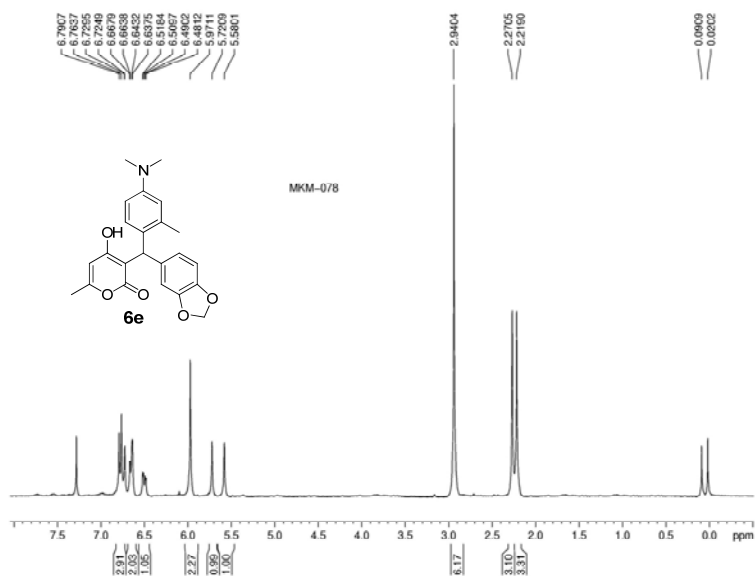

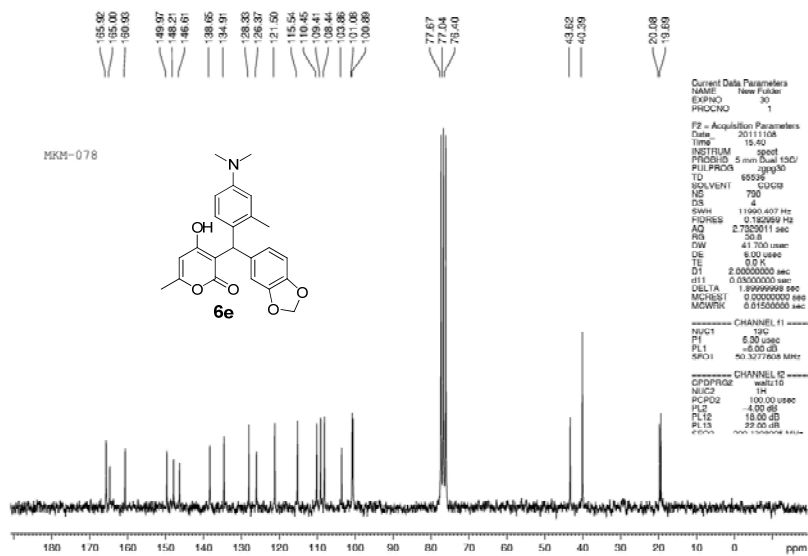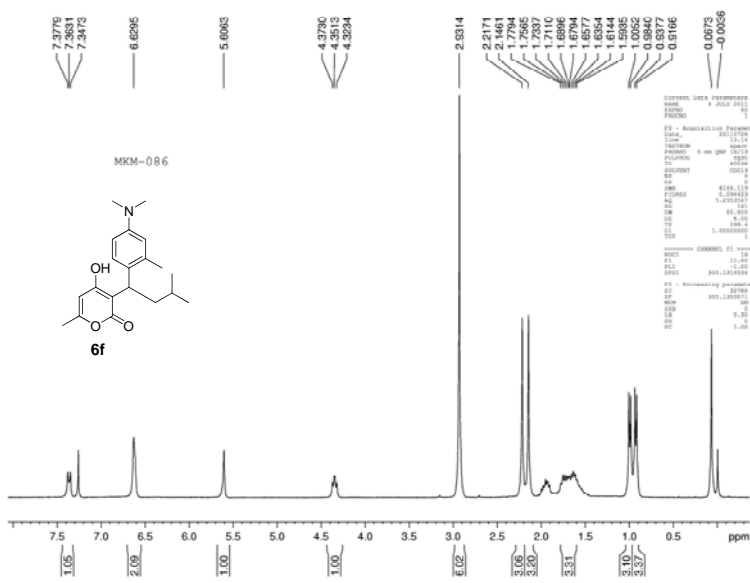

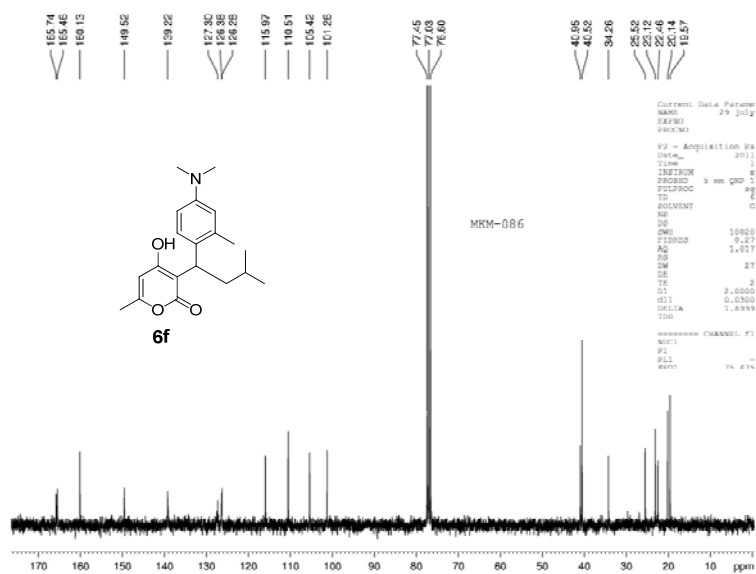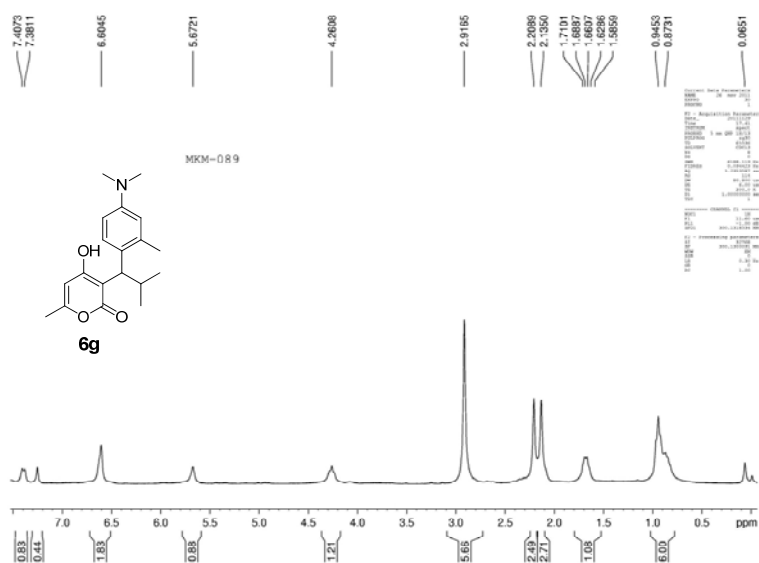





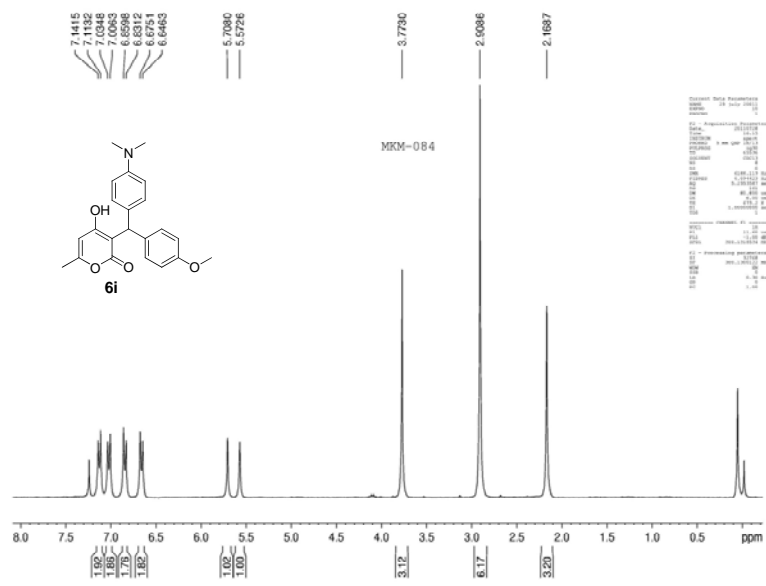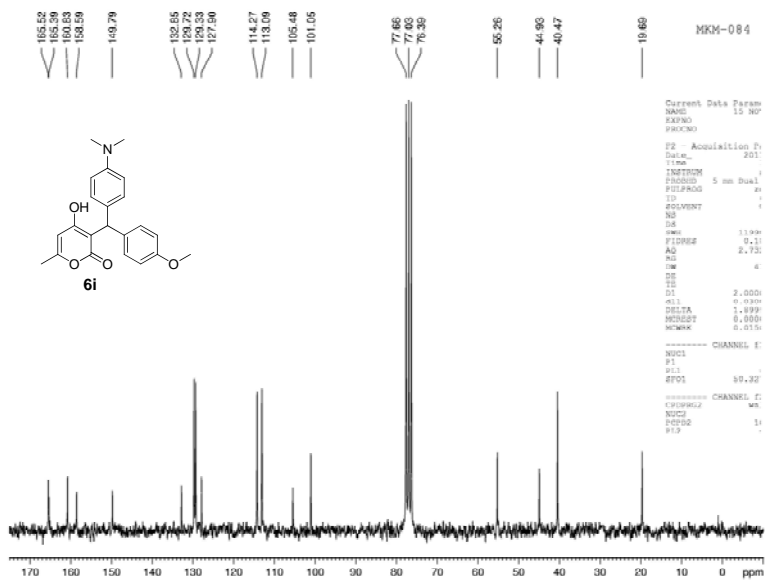

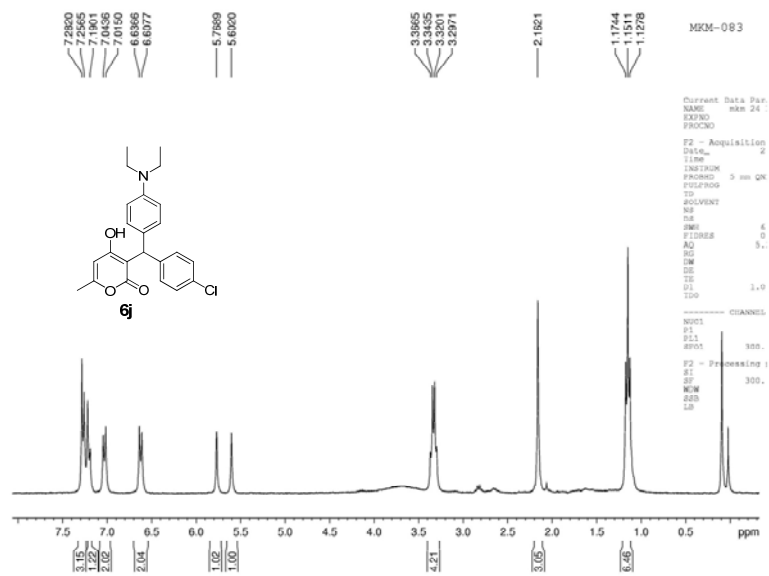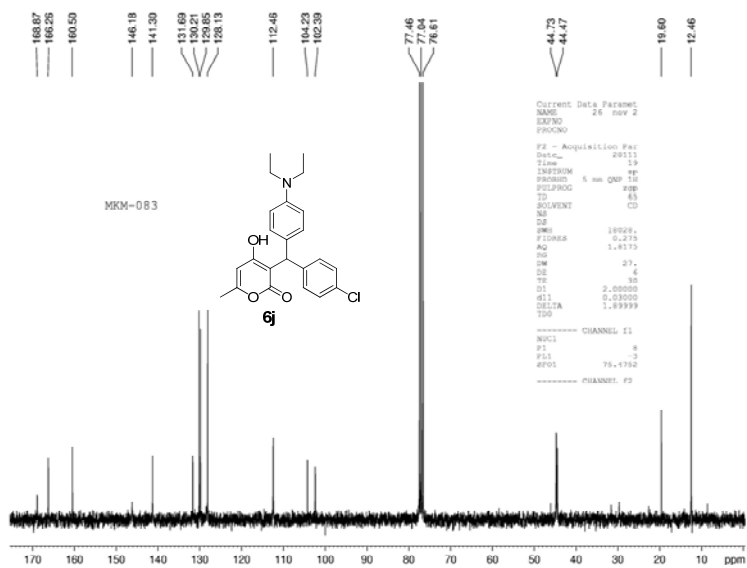

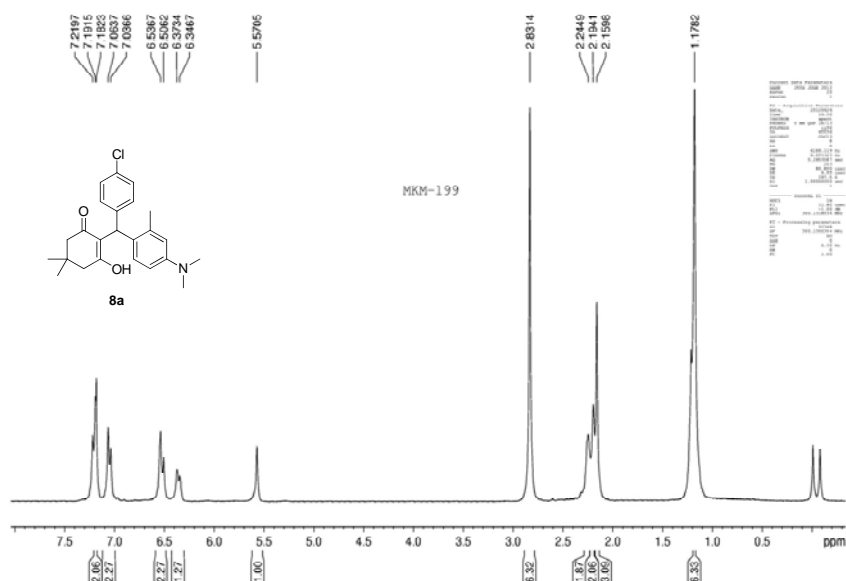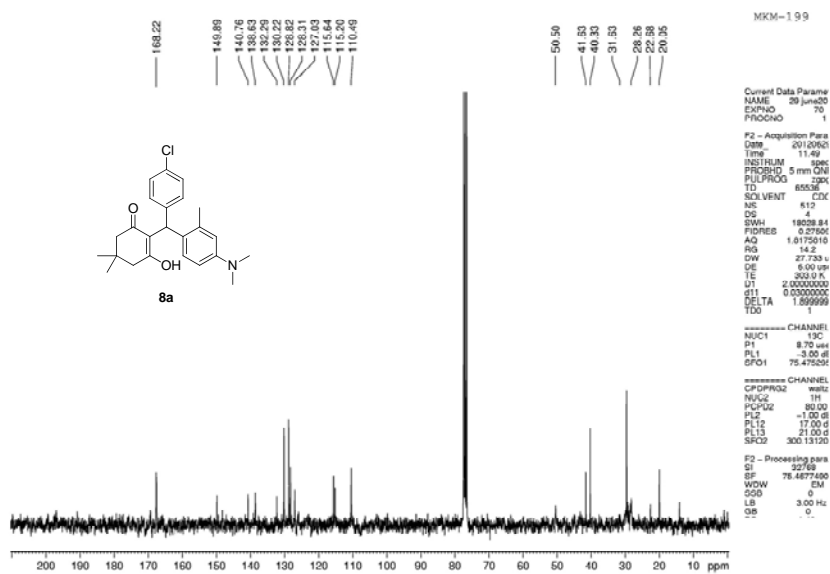

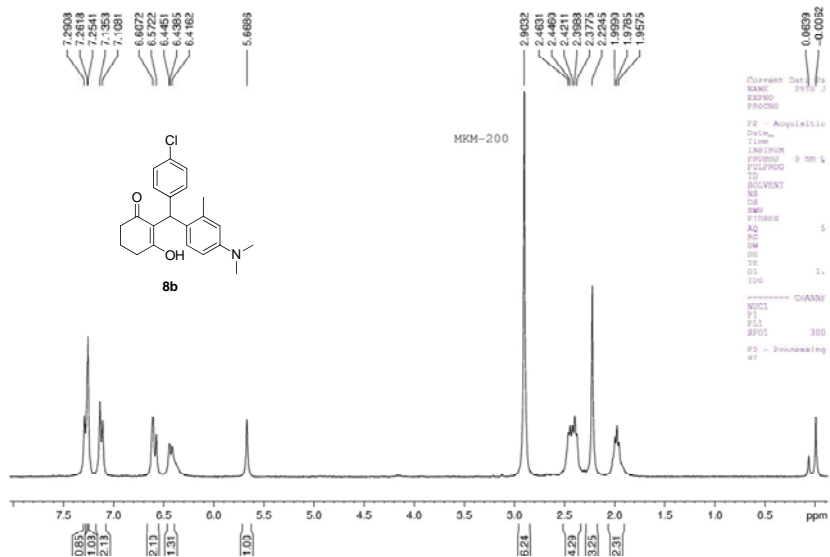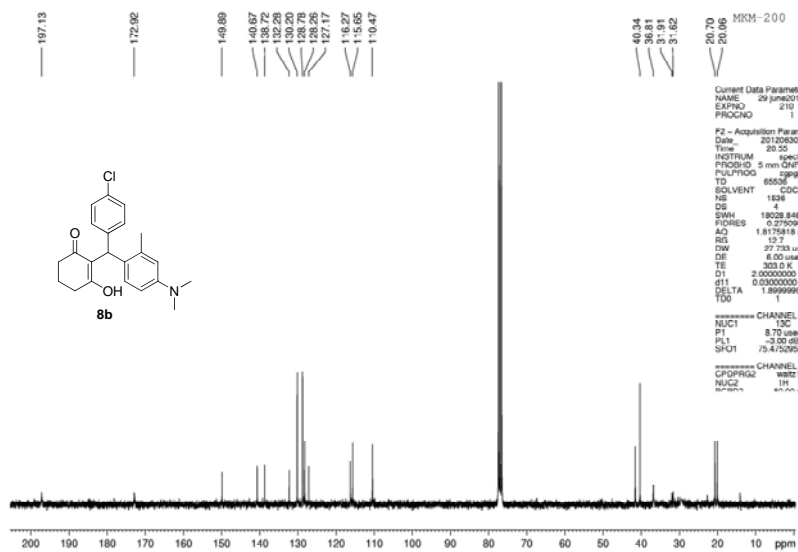

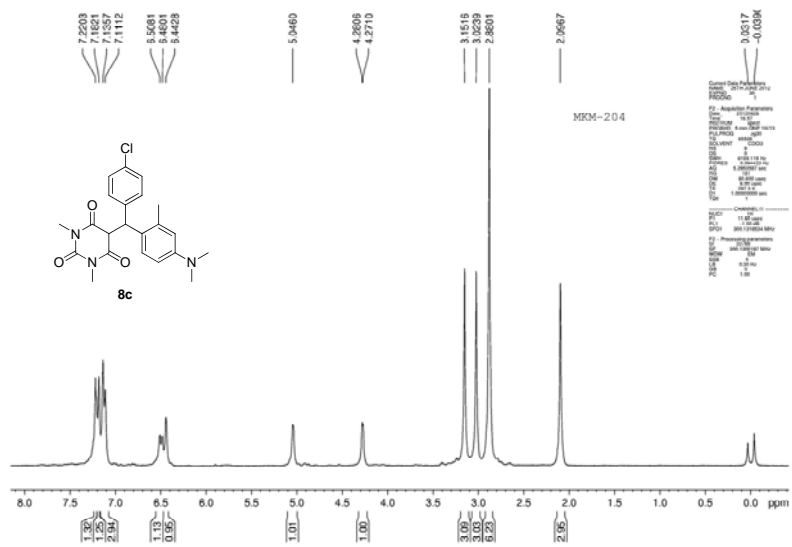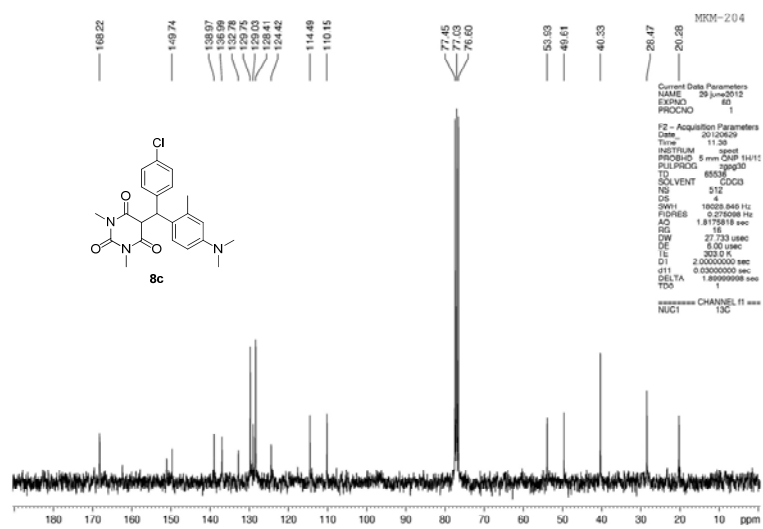

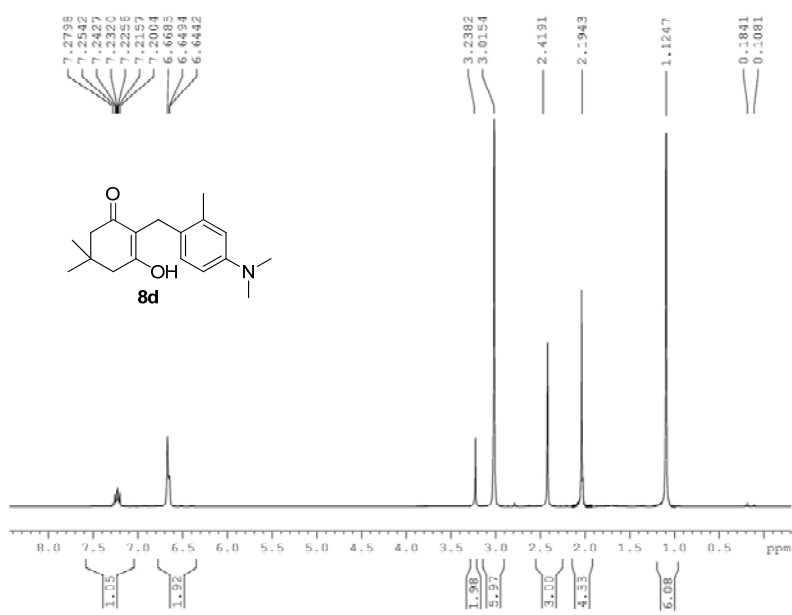

Supplement: c2ra21056h.pdf [file c2ra21056h.pdf]
